# Supplementary material
Source: PubMed Central journal article supplement (PMC4675463)
Supplement: NIHMS740868-supplement-01.pdf [file NIHMS740868-supplement-01.pdf]

## Appendix A

### ICD codes for risk marker and outcome definitions

#### ICD-10 codes for outcome definitions

##### Definition 1: PDO (unintentional or of undetermined intent)

|                                                                                                                                                                                                                                                                                                                                                                                                                                                                                                                                                                                                                                                                                                   |                                                                         |
|---------------------------------------------------------------------------------------------------------------------------------------------------------------------------------------------------------------------------------------------------------------------------------------------------------------------------------------------------------------------------------------------------------------------------------------------------------------------------------------------------------------------------------------------------------------------------------------------------------------------------------------------------------------------------------------------------|-------------------------------------------------------------------------|
| X40–X44                                                                                                                                                                                                                                                                                                                                                                                                                                                                                                                                                                                                                                                                                           | Unintentional poisoning due to drugs                                    |
| Y10–Y14                                                                                                                                                                                                                                                                                                                                                                                                                                                                                                                                                                                                                                                                                           | Poisoning of undetermined intent with contributing causes               |
| Exclusion diagnoses                                                                                                                                                                                                                                                                                                                                                                                                                                                                                                                                                                                                                                                                               |                                                                         |
| V66                                                                                                                                                                                                                                                                                                                                                                                                                                                                                                                                                                                                                                                                                               | Palliative care                                                         |
| 140, 141, 142, 143, 144, 145, 146, 147, 148, 149, 150, 151, 152, 153, 154, 155, 156, 157, 158, 159, 160, 161, 162, 163, 164, 165, 170, 171, 172, 174, 175, 176, 179, 180, 181, 182, 183, 184, 185, 186, 187, 188, 189, 190, 191, 192, 193, 194, 195, 200, 201, 202, 203, 204, 205, 206, 207, 208                                                                                                                                                                                                                                                                                                                                                                                                  | Cancer                                                                  |
| 282.6, 282.41                                                                                                                                                                                                                                                                                                                                                                                                                                                                                                                                                                                                                                                                                     | Sickle cell anemia                                                      |
| 196, 197, 198, 199.0, 199.1                                                                                                                                                                                                                                                                                                                                                                                                                                                                                                                                                                                                                                                                       | Metastatic carcinoma                                                    |
| Other risk markers                                                                                                                                                                                                                                                                                                                                                                                                                                                                                                                                                                                                                                                                                |                                                                         |
| Psychiatric disorder                                                                                                                                                                                                                                                                                                                                                                                                                                                                                                                                                                                                                                                                              |                                                                         |
| 300                                                                                                                                                                                                                                                                                                                                                                                                                                                                                                                                                                                                                                                                                               | Anxiety disorder                                                        |
| 327.21, 327.23, 327.20, 327.29, 780.53, 780.57                                                                                                                                                                                                                                                                                                                                                                                                                                                                                                                                                                                                                                                    | Central sleep apnea                                                     |
| 298, 311, 309.0, 309.1                                                                                                                                                                                                                                                                                                                                                                                                                                                                                                                                                                                                                                                                            | Depression                                                              |
| 296                                                                                                                                                                                                                                                                                                                                                                                                                                                                                                                                                                                                                                                                                               | Episodic mood disorder [1]                                              |
| 296.2, 296.3                                                                                                                                                                                                                                                                                                                                                                                                                                                                                                                                                                                                                                                                                      | Major depressive disorder                                               |
| 296, 301                                                                                                                                                                                                                                                                                                                                                                                                                                                                                                                                                                                                                                                                                          | Personality disorder                                                    |
| 309.81                                                                                                                                                                                                                                                                                                                                                                                                                                                                                                                                                                                                                                                                                            | Post-traumatic stress disorder                                          |
| 292, 293.0, 293.8, 294, 295, 297.1, 297.3, 297.8, 297.9, 299                                                                                                                                                                                                                                                                                                                                                                                                                                                                                                                                                                                                                                      | Psychoses agitation [35]                                                |
| 295                                                                                                                                                                                                                                                                                                                                                                                                                                                                                                                                                                                                                                                                                               | Schizophrenia                                                           |
| Substance Abuse                                                                                                                                                                                                                                                                                                                                                                                                                                                                                                                                                                                                                                                                                   |                                                                         |
| 304                                                                                                                                                                                                                                                                                                                                                                                                                                                                                                                                                                                                                                                                                               | Drug dependence                                                         |
| 305.0                                                                                                                                                                                                                                                                                                                                                                                                                                                                                                                                                                                                                                                                                             | Alcohol abuse                                                           |
| 305.5                                                                                                                                                                                                                                                                                                                                                                                                                                                                                                                                                                                                                                                                                             | Opioid abuse                                                            |
| 305.4                                                                                                                                                                                                                                                                                                                                                                                                                                                                                                                                                                                                                                                                                             | Sedative anxiolytic abuse                                               |
| 305.7                                                                                                                                                                                                                                                                                                                                                                                                                                                                                                                                                                                                                                                                                             | Amphetamine abuse                                                       |
| 305.8                                                                                                                                                                                                                                                                                                                                                                                                                                                                                                                                                                                                                                                                                             | Antidepressant abuse                                                    |
| 305.2, 305.3, 305.6, 305.9                                                                                                                                                                                                                                                                                                                                                                                                                                                                                                                                                                                                                                                                        | Other drug abuse                                                        |
| 305.1                                                                                                                                                                                                                                                                                                                                                                                                                                                                                                                                                                                                                                                                                             | Tobacco use disorder                                                    |
| 303, 304, 305.0, 305.2, 305.3, 305.4, 305.5, 305.6, 305.7, 305.8, 305.9, 965.0, V11.3                                                                                                                                                                                                                                                                                                                                                                                                                                                                                                                                                                                                             | Alcohol drug seeking                                                    |
| V11.3, 291, 303.0, 303.9, 305.0, 357.5, 425.5, 535.3, 571.0, 571.1, 571.3, 790.3, 980.0                                                                                                                                                                                                                                                                                                                                                                                                                                                                                                                                                                                                           | Alcohol abuse [35]                                                      |
| 965.00, 965.01, 965.02, 965.09                                                                                                                                                                                                                                                                                                                                                                                                                                                                                                                                                                                                                                                                    | Prior opioid overdose                                                   |
| Other conditions                                                                                                                                                                                                                                                                                                                                                                                                                                                                                                                                                                                                                                                                                  |                                                                         |
| 789                                                                                                                                                                                                                                                                                                                                                                                                                                                                                                                                                                                                                                                                                               | Abdominal symptoms [1]                                                  |
| 780                                                                                                                                                                                                                                                                                                                                                                                                                                                                                                                                                                                                                                                                                               | General symptoms that is, alteration of consciousness, and so forth [1] |
| 521, 522, 523, 525.3, 525.9, 873.63                                                                                                                                                                                                                                                                                                                                                                                                                                                                                                                                                                                                                                                               | Nontraumatic dental conditions                                          |
| 786                                                                                                                                                                                                                                                                                                                                                                                                                                                                                                                                                                                                                                                                                               | Respiratory syndrome [1]                                                |
| 729                                                                                                                                                                                                                                                                                                                                                                                                                                                                                                                                                                                                                                                                                               | Soft tissue disorder—fasciitis or limb pain [1]                         |
| 722                                                                                                                                                                                                                                                                                                                                                                                                                                                                                                                                                                                                                                                                                               | Vertebrae disorders [1]                                                 |
| Chronic pain                                                                                                                                                                                                                                                                                                                                                                                                                                                                                                                                                                                                                                                                                      |                                                                         |
| 719                                                                                                                                                                                                                                                                                                                                                                                                                                                                                                                                                                                                                                                                                               | Joint disorder [1]                                                      |
| 307.81, 339.00, 339.01, 339.02, 339.03, 339.04, 339.05, 339.09, 339.10, 339.11, 339.12, 339.20, 339.21, 339.22, 339.3, 339.41, 339.42, 339.43, 339.44, 339.81, 339.82, 339.83, 339.84, 339.85, 339.89, 346.0, 346.00, 346.01, 346.02, 346.03, 346.1, 346.10, 346.11, 346.12, 346.13, 346.2, 346.20, 346.21, 346.22, 346.23, 346.30, 346.31, 346.32, 346.33, 346.40, 346.41, 346.42, 346.43, 346.50, 346.51, 346.52, 346.53, 346.70, 346.71, 346.72, 346.73, 346.8, 346.80, 346.81, 346.82, 346.83, 346.9, 346.90, 346.91, 346.92, 346.93, 784.0                                                                                                                                                   | Headaches [44]                                                          |
| 720.1, 720.2, 720.81, 720.89, 720.9, 721.0, 721.1, 721.2, 721.3, 721.41, 721.42, 721.5, 721.6, 721.7, 721.8, 721.90, 721.91, 722.0, 722.10, 722.11, 722.2, 722.30, 722.31, 722.32, 722.39, 722.4, 722.51, 722.52, 722.6, 722.70, 722.71, 722.72, 722.73, 72.280, 722.81, 722.82, 722.83, 722.90, 722.91, 722.92, 722.93, 723.0, 723.1, 723.2, 723.3, 72.35, 723.6, 723.7, 723.9, 724.00, 724.01, 724.02, 724.03, 724.09, 724.1, 724.2, 724.3, 724.4, 724.5, 724.6, 724.70, 724.71, 724.79, 724.8, 724.9, 756.10, 756.11, 756.12, 756.13, 756.14, 756.15, 756.16, 756.17, 756.19                                                                                                                   | Back pain [44]                                                          |
| 550.00, 550.01, 550.02, 550.03, 550.10, 550.11, 550.12, 550.13, 551.00, 551.01, 551.02, 551.03, 551.1, 551.20, 551.21, 551.29, 552.00, 552.01, 552.02, 552.03, 552.1, 552.20, 552.21, 552.29, 560.81, 562.01, 562.03, 562.11, 562.13, 567.2, 567.21, 567.22, 567.31, 567.38, 567.8, 567.82, 567.89, 567.9, 569.5, 574.00, 574.01, 574.10, 574.11, 574.20, 574.21, 574.30, 574.31, 574.40, 574.41, 574.50, 574.51, 574.60, 574.61, 574.70, 574.71, 574.80, 574.81, 574.90, 574.91, 575.0, 575.1, 575.10, 575.11, 575.12, 577.0, 577.1, 592.0, 592.1, 592.9, 594.0, 594.1, 594.2, 594.8, 594.9, 596.0, 788.0, 789.0, 789.02, 789.60, 789.61, 789.62, 789.63, 789.64, 789.65, 789.66, 789.67, 789.69 | Visceral pain [44]                                                      |
| 053.13, 072.72, 337.0, 337.1, 353.0, 353.1, 353.2, 353.3, 353.4, 353.5, 353.6, 353.8, 353.9, 354.0, 354.1, 354.2, 354.3, 354.4, 354.5, 354.8, 354.9, 355.0, 355.1, 355.2, 355.3, 355.4, 355.5, 355.6, 355.7, 355.71, 355.79, 355.8, 355.9, 356.0, 356.1, 356.2, 356.3, 356.4, 356.8, 356.9, 357.0, 357.1, 357.2, 357.4, 357.5, 357.6, 357.7, 357.8, 357.81, 357.82, 357.89, 357.9, 377.33, 377.34, 377.41                                                                                                                                                                                                                                                                                         | Neuropathy [44]                                                         |

(continued on next page)

(continued)

## ICD-10 codes for outcome definitions

729.1

725, 726.0, 726.10, 726.11, 726.12, 726.19, 726.2, 726.30, 726.31, 726.32, 726.33, 726.39, 726.4, 726.5, 726.60, 726.61, 726.62, 726.63, 726.64, 726.65, 726.69, 726.71, 726.72, 726.90, 727.00, 727.03, 727.04, 727.05, 727.06, 727.09, 727.2, 727.3, 727.49, 727.50, 727.51, 727.60, 727.61, 727.62, 727.63, 727.64, 727.65, 727.66, 727.67, 727.68, 727.69, 727.89, 727.9, 728.11, 728.12, 728.81, 728.83, 728.86, 728.89, 728.9, 729.0, 729.1, 72.94, 729.5, 729.71, 729.72, 729.73, 729.79, 729.89, 729.9, 729.91, 729.92, 781.99, 830.0, 830.1, 831.00, 831.01, 831.02, 831.03, 831.04, 831.09, 831.10, 831.11, 831.12, 831.13, 831.14, 831.19, 832.00, 832.01, 832.02, 832.03, 832.04, 832.09, 832.10, 832.11, 832.12, 832.13, 832.14, 832.19, 832.2, 833.00, 833.01, 833.02, 833.03, 833.04, 833.05, 833.09, 833.10, 833.11, 833.12, 83.313, 833.14, 833.15, 833.19, 834.00, 834.01, 834.02, 834.10, 834.11, 834.12, 835.00, 835.01, 835.02, 835.03, 835.10, 835.11, 835.12, 835.13, 836.0, 836.1, 836.2, 836.3, 836.4, 836.50, 836.51, 836.52, 836.53, 836.54, 836.59, 836.60, 836.61, 836.62, 836.63, 836.64, 836.69, 837.0, 837.1, 838.00, 838.01, 838.02, 838.03, 838.04, 838.05, 838.06, 838.09, 838.10, 838.11, 838.12, 838.13, 838.14, 838.15, 838.16, 838.19, 839.00, 839.01, 839.02, 839.03, 839.04, 839.05, 839.06, 839.07, 839.08, 839.10, 839.11, 839.12, 839.13, 839.14, 839.15, 839.16, 839.17, 839.18, 839.20, 839.21, 839.30, 839.31, 839.40, 839.41, 839.42, 839.49, 839.50, 839.51, 839.52, 839.59, 839.61, 839.69, 839.71, 839.79, 83.98, 838.9, 840.0, 840.1, 840.2, 840.3, 840.4, 840.5, 840.6, 840.7, 840.8, 840.9, 841.0, 841.1, 841.2, 841.3, 841.8, 841.9, 842.00, 842.01, 842.02, 842.09, 842.10, 842.11, 842.12, 842.13, 842.19, 843.0, 843.1, 843.8, 843.9, 844.0, 844.1, 844.2, 844.3, 844.8, 844.9, 845.00, 845.01, 845.02, 845.03, 845.09, 845.10, 845.11, 845.12, 845.13, 845.19, 846.0, 846.1, 846.2, 846.3, 846.8, 846.9, 847.0, 847.1, 847.2, 847.3, 847.4, 847.9, 848.0, 848.1, 848.2, 848.3, 848.40, 848.41, 848.42, 848.49, 848.5, 848.8, 848.9, 905.6, 905.7, V43.60, V43.61, V43.62, V436.3, V436.4, V436.5, V436.6, V43.69, V43.7, V48.3, V49.60, V49.61, V49.62, V49.63, V49.64, V49.65, V49.66, V49.67, V49.70, V49.71, V49.72, V49.73, V49.74, V49.75, V49.76, V49.77

710.0, 710.1, 710.2, 710.3, 710.4, 710.8, 710.9, 711.00, 711.01, 711.02, 711.03, 711.04, 711.05, 711.06, 711.07, 711.08, 711.09, 711.10, 711.11, 711.12, 711.13, 711.14, 711.15, 711.16, 711.17, 711.18, 711.19, 711.20, 71.121, 711.22, 711.23, 711.24, 711.25, 711.26, 711.27, 711.28, 711.29, 711.30, 711.31, 711.32, 711.33, 711.34, 711.35, 711.36, 711.37, 711.38, 711.39, 711.40, 711.41, 711.42, 711.43, 711.44, 711.45, 711.46, 711.47, 711.48, 711.49, 711.50, 711.51, 711.52, 711.53, 711.54, 711.55, 711.56, 711.57, 711.58, 711.59, 711.60, 711.61, 711.62, 711.63, 711.64, 711.65, 711.66, 711.67, 711.68, 711.69, 711.70, 711.71, 711.72, 711.73, 711.74, 711.75, 711.76, 711.77, 711.78, 711.79, 711.80, 711.81, 711.82, 711.83, 711.84, 711.85, 711.86, 71.187, 711.88, 711.89, 711.90, 711.91, 711.92, 711.93, 711.94, 711.95, 711.96, 711.97, 711.98, 711.99, 713.0, 713.1, 713.2, 713.3, 713.4, 713.5, 713.6, 713.7, 713.8, 714.0, 714.1, 714.2, 714.30, 714.31, 714.32, 714.33, 714.4, 714.81, 714.89, 714.9, 715.00, 715.04, 715.09, 715.10, 715.11, 715.12, 715.13, 715.14, 715.15, 715.16, 715.17, 715.18, 715.20, 715.21, 715.22, 715.23, 715.24, 715.25, 715.26, 715.27, 715.28, 715.30, 715.31, 715.32, 715.33, 715.34, 715.35, 715.36, 715.37, 715.38, 715.80, 715.89, 715.90, 715.91, 715.92, 715.93, 715.94, 715.95, 715.96, 715.97, 715.98, 716.00, 716.01, 716.02, 716.03, 716.04, 716.05, 716.06, 716.07, 716.08, 716.09, 716.10, 716.11, 716.12, 716.13, 716.14, 716.15, 716.16, 716.17, 716.18, 716.19, 716.20, 716.21, 716.22, 716.23, 716.24, 716.25, 716.26, 716.27, 716.28, 716.29, 716.30, 716.31, 716.32, 716.33, 716.34, 716.35, 716.36, 716.37, 716.38, 716.39, 716.40, 71.641, 716.42, 716.43, 716.44, 716.45, 716.46, 716.47, 716.48, 716.49, 716.50, 716.51, 716.52, 716.53, 716.54, 716.55, 716.56, 716.57, 716.58, 716.59, 716.60, 716.61, 716.62, 716.63, 716.64, 716.65, 716.66, 716.67, 716.68, 716.80, 716.81, 716.82, 716.83, 716.84, 716.85, 716.86, 716.87, 716.88, 716.89, 716.90, 716.91, 716.92, 716.93, 716.94, 716.95, 716.96, 716.97, 716.98, 716.99, 717.0, 717.1, 717.2, 717.3, 717.40, 717.41, 717.42, 717.43, 717.49, 717.5, 717.6, 717.7, 717.81, 717.82, 717.83, 717.84, 717.85, 717.89, 717.9, 718.00, 718.01, 718.02, 718.03, 718.04, 718.05, 718.07, 718.08, 718.09, 718.10, 718.11, 718.12, 718.13, 718.14, 718.15, 718.17, 718.18, 718.19, 718.20, 718.21, 718.22, 718.23, 718.24, 718.25, 718.26, 718.27, 718.28, 718.29, 718.30, 71.831, 718.32, 718.33, 718.34, 718.35, 718.36, 718.37, 718.38, 718.39, 718.50, 718.51, 718.52, 718.53, 718.54, 718.55, 718.56, 718.57, 718.58, 718.59, 718.60, 718.65, 718.70, 718.71, 718.72, 718.73, 718.74, 718.75, 718.76, 718.77, 718.78, 718.79, 718.80, 718.81, 718.82, 718.83, 718.84, 718.85, 718.86, 718.87, 718.88, 718.89, 718.90, 718.91, 718.92, 718.93, 718.94, 718.95, 718.97, 718.98, 718.99, 719.00, 719.01, 719.02, 719.03, 719.04, 719.05, 719.06, 719.07, 719.08, 719.09, 719.10, 719.11, 719.12, 719.13, 719.14, 719.15, 719.16, 719.17, 719.18, 719.19, 719.20, 719.21, 719.22, 719.23, 719.24, 719.25, 719.26, 719.27, 719.28, 719.29, 719.30, 719.31, 719.32, 719.33, 719.34, 719.35, 719.36, 719.37, 719.38, 719.39, 719.40, 719.41, 719.42, 719.43, 719.44, 719.45, 719.46, 719.47, 719.48, 719.49, 719.50, 719.51, 719.52, 719.53, 719.54, 719.55, 719.56, 719.57, 719.58, 719.59, 719.60, 719.61, 719.62, 719.63, 719.64, 719.65, 719.66, 719.67, 719.68, 719.69, 719.70, 719.75, 719.76, 719.77, 719.78, 719.79, 719.80, 719.81, 719.82, 719.83, 719.84, 719.85, 719.86, 719.87, 719.88, 719.89, 719.90, 719.91, 719.92, 719.93, 719.94, 719.95, 719.96, 719.97, 719.98, 719.99, 720.0, V13.4

Fibromyalgia [44]

Musculoskeletal pain [44]

Arthritis [44]
